# Supplementary material for: Real-time reverse transcription PCR-based sequencing-independent pathotyping of Eurasian avian influenza A viruses of subtype H7
Source: Virol J. 2017 Jul 24;14:137. doi: 10.1186/s12985-017-0808-3 (PMC5525275; doi:10.1186/s12985-017-0808-3)
Supplement: Additional file 1: — Nucleotide sequences encoding the HA endoproteolytic cleavage site of H7N7 low pathogenic avian influenza viruses generated within this study. (PDF 90 kb) [file 12985_2017_808_MOESM1_ESM.pdf]

|                                     | 1                                                            | 10                          | 20                          | 30  | 40  | 50  | 60  |
|-------------------------------------|--------------------------------------------------------------|-----------------------------|-----------------------------|-----|-----|-----|-----|
|                                     |                                                              |                             |                             |     |     |     |     |
| A/duck/Potsdam/13/1980              | TATGTCCGAGATATGTTAAGCAAGAGAGCCTGCTACTGGCAACAGGGATGAAGAACGTTT |                             |                             |     |     |     |     |
| A/swan/Potsdam/64/1981              | TATGTCCGAGATATGTTAAGCAAGAGAGCCTGCTACTGGCAACAGGGATGAAGAACGTTT |                             |                             |     |     |     |     |
| A/avian/R224/2010                   | TATGTCCGAGATATGTTAAGCAAGAGAGCCTGCTACTGGCAACAGGGATGAAGAACGTTT |                             |                             |     |     |     |     |
| A/commonpochard/Germany/R916/2006   | TATGTCCGAGATATGTTAAGCAGGAGAGTCTGATGCTGGCAACAGGAATGAAGAATGTTT |                             |                             |     |     |     |     |
| A/mallard/Alberta/8734/2007         | TATGTCCGAGATATGTTAAGCAAGAGAGCCTGCTACTGGCAACAGGGATGAAGAACGTTT |                             |                             |     |     |     |     |
| A/chicken/Germany/AR909/2013        | -ATGTCCGAGATATGTTAAGCAGGAGAGTCTGATGCTAGCAACCGGAATGAAAAATGTTT |                             |                             |     |     |     |     |
| A/chicken/Germany/AR915/2015        | -----TATGTTAAGCAGGAGAGTCTGATGCTAGCAACCGGAATGAAAAACGTTT       |                             |                             |     |     |     |     |
| A/chicken/Germany/AR925/2015        | TATGTCCGAGATATGTTAAGCAGGAGAGTCTGATGCTAGCAACCGGAATGAAAAACGTTT |                             |                             |     |     |     |     |
| A/chicken/Germany/AR934/2015        | TATGTCCGAGATATGTTAAGCAGGAGAGTCTGATGCTAGCAACCGGAATGAAAAACGTTT |                             |                             |     |     |     |     |
| A/chicken/Germany/AR942/2015        | -----TATGTTAAGCAGGAGAGTCTGATGCTAGCAACCGGAATGAAAAACGTTT       |                             |                             |     |     |     |     |
| A/chicken/Germany/AR943/2015        | TATGTCCGAGATATGTTAAGCAGGAGAGTCTGATGCTAGCAACCGGAATGAAAAACGTTT |                             |                             |     |     |     |     |
| A/chicken/Germany/AR944/2015        | TATGTCCGAGATATGTTAAGCAGGAGAGTCTGATGCTAGCAACCGGAATGAAAAACGTTT |                             |                             |     |     |     |     |
| A/Mallard/Germany/R192/2009         | TATGTCCGAGATATGTTAAGCAGGAAAGTCTGATGCTGGCAACAGGAATGAAAAATGTTT |                             |                             |     |     |     |     |
| A/duck/Germany/R3129/2007           | TATGTCCGAGATATGTTAAGCAGGAGAGTCTGATGCTGGCAACAGGAATGAAAAATGTTT |                             |                             |     |     |     |     |
| A/Greylag goose/Germany/R752/2006   | TATGTCCGAGATATGTTAAGCAGGAGAGTTTGATGCTGGCAACAGGAATGAAGAATGTTT |                             |                             |     |     |     |     |
| A/mallard/Germany/R756/2006         | TATGTCCGAGATATGTTAAGCAGGAGAGTTTGATGCTGGCAACAGGAATGAAGAATGTTT |                             |                             |     |     |     |     |
| A/Teal/Föhr/Wv177/2005              | TATGTCCGAGATATGTTAAGCAGGAGAGTCTGATGCTGGCAACAGGAATGAAGAATGTTT |                             |                             |     |     |     |     |
| A/turkey/Germany/R655-5/2009        | TATGTCCGAGATATGTTAAGCAGGAGAGTCTGATGCTGGCAACAGGAATGAAGAATGTTT |                             |                             |     |     |     |     |
| A/francolin/Dubai/AR440/2014        | TATGTCCGAGATATGTTAAGCAGGAGAGTCTGATGCTGGCAACAGGAATGAAGAATGTTT |                             |                             |     |     |     |     |
| A/houbara/Dubai/AR438/2014          | TATGTCCGAGATATGTTAAGCAGGAGAGTCTGATGCTGGCAACAGGAATGAAGAATGTTT |                             |                             |     |     |     |     |
| A/Peregrine falcon/Dubai/AR439/2014 | TATGTCCGAGATATGTTAAGCAGGAGAGTCTGATGCTGGCAACAGGAATGAAGAATGTTT |                             |                             |     |     |     |     |
| A/duck/Germany/AR234/1/2016         | -----TATGTTAAGCAGGAGAGTCTGATGCTGGCAACAGGAATGAAAAATGTTT       |                             |                             |     |     |     |     |
| A/nandu/Germany/AR142/2013          | -----TATGTTAAGCAGGAGAGTCTGATGCTGGCAACAGGAATGAAAAATGTTT       |                             |                             |     |     |     |     |
| A/duck/Alberta/48/1976              | TATGTCCGAGATATGTTAAGCAGGAGAGTCTGATGCTGGCAACAGGAATGAAGAATGTTT |                             |                             |     |     |     |     |
| A/houbara/Dubai/AR433/2014          | AATGTCCGAGATATGTTAAGCAGGAGAGTCTGATGCTGGCAACAGGAATGAAGAATGTTT |                             |                             |     |     |     |     |
| A/houbara/Dubai/AR434/2014          | AATGTCCGAGATATGTTAAGCAGGAGAGTCTGATGCTGGCAACAGGAATGAAGAATGTTT |                             |                             |     |     |     |     |
| A/houbara/Dubai/AR435/2014          | AATGTCCGAGATATGTTAAGCAGGAGAGTCTGATGCTGGCAACAGGAATGAAGAATGTTT |                             |                             |     |     |     |     |
| A/houbara/Dubai/AR436/2014          | AATGTCCGAGATATGTTAAGCAGGAGAGTCTGATGCTGGCAACAGGAATGAAGAATGTTT |                             |                             |     |     |     |     |
| A/houbara/Dubai/AR437/2014          | TATGTCCGAGATATGTTAAGCAGGAGAGTCTGATGCTGGCAACAGGAATGAAGAATGTTT |                             |                             |     |     |     |     |
| A/mallard/Sko212-219K/2007          | TATGTCCGAGATATGTTAAGCAGGAGAGTCTGATGCTGGCAACAGGAATGAAGAATGTTT |                             |                             |     |     |     |     |
| A/mallard/NVP/41/2004               | TATGTCCGAGATATGTTAAGCAAGAGAGTCTGCTGCTGGCAACAGGAATGAAGAATGTTT |                             |                             |     |     |     |     |
| A/mallard/Germany/R721/2006         | -----                                                        |                             |                             |     |     |     |     |
|                                     | 61                                                           | 70                          | 80                          | 90  | 100 | 110 | 120 |
|                                     |                                                              |                             |                             |     |     |     |     |
| A/duck/Potsdam/13/1980              | CTGAAATT                                                     | CCAAAAGGGAGAGGACTATTTGGTGCC | CATAGCGGGTTTTATTGAAAATGGGT  |     |     |     |     |
| A/swan/Potsdam/64/1981              | CTGAAATT                                                     | CCAAAAGGGAGAGGACTATTTGGTGCC | CATAGCGGGTTTTATTGAAAATGGGT  |     |     |     |     |
| A/avian/R224/2010                   | CTGAAATT                                                     | CCAAAAGGGAGAGGACTATTTGGTGCC | CATAGCGGGTTTTATT-AAAATGGGT  |     |     |     |     |
| A/commonpochard/Germany/R916/2006   | CCGAAATC                                                     | CCAAAGGGAAGAGGCCTATTTGGTGCT | TATAGCGGGTTTCATTGAAAATGGAT  |     |     |     |     |
| A/mallard/Alberta/8734/2007         | CTGAAATT                                                     | CCAAAAGGGAGAGGACTATTTGGTGCC | CATAGCGGGTTTTATTGAAAATGGGT  |     |     |     |     |
| A/chicken/Germany/AR909/2013        | CTGAAATC                                                     | CCAAAGGGAAGAGGCCTATTTGGTGCT | TATAGCGGGTTTCATTGAAAATGGAT  |     |     |     |     |
| A/chicken/Germany/AR915/2015        | CTGAAATC                                                     | CCAAAGGGAAGAGGCCTATTTGGTGCT | TATAGCGGGATTTCATTGAAAATGGAT |     |     |     |     |
| A/chicken/Germany/AR925/2015        | CTGAAATC                                                     | CCAAAGGGAAGAGGCCTATTTGGTGCT | TATAGCGGGATTTCATTGAAAATGGAT |     |     |     |     |
| A/chicken/Germany/AR934/2015        | CTGAAATC                                                     | CCAAAGGGAAGAGGCCTATTTGGTGCT | TATAGCGGGATTTCATTGAAAATGGAT |     |     |     |     |
| A/chicken/Germany/AR942/2015        | CTGAAATC                                                     | CCAAAGGGAAGAGGCCTATTTGGTGCT | TATAGCGGGATTTCATTGAAAATGG-- |     |     |     |     |
| A/chicken/Germany/AR943/2015        | CTGAAATC                                                     | CCAAAGGGAAGAGGCCTATTTGGTGCT | TATAGCGGGATTTCATTGAAAATGGAT |     |     |     |     |
| A/chicken/Germany/AR944/2015        | CTGAAATC                                                     | CCAAAGGGAAGAGGCCTATTTGGTGCT | TATAGCGGGATTTCATTGAAAATGGAT |     |     |     |     |
| A/Mallard/Germany/R192/2009         | CCGAACTC                                                     | CCAAAGGGAAGAGGCCTATTTGGTGCT | TATAGCGGGTTTCATTGAAAATGGAT  |     |     |     |     |
| A/duck/Germany/R3129/2007           | CTGAAATC                                                     | CCAAAGGGAAGAGGCCTATTTGGTGCT | TATAGCGGGTTTCATTGAAAATGGAT  |     |     |     |     |
| A/Greylag goose/Germany/R752/2006   | CCGAAATC                                                     | CCAAAGGGAAGAGGCCTATTTGGTGCT | TATAGCGGGTTTCATTGAAAATGGAT  |     |     |     |     |
| A/mallard/Germany/R756/2006         | CCGAAATC                                                     | CCAAAGGGAAGAGGCCTATTTGGTGCT | TATAGCGGGTTTCATTGAAAATGGAT  |     |     |     |     |
| A/Teal/Föhr/Wv177/2005              | CCGAAATC                                                     | CCAAAGGGAAGAGGCCTATTTGGTGCT | TATAGCGGGTTTCATTGAAAATGGAT  |     |     |     |     |
| A/turkey/Germany/R655-5/2009        | CCGAAATC                                                     | CCAAAGGGAAGAGGCCTATTTGGTGCT | TATAGCGGGTTTCATTGAAAATGGAT  |     |     |     |     |
| A/francolin/Dubai/AR440/2014        | CCGAACTC                                                     | CCAAAGGGAAGAGGCCTATTTGGTGCT | TATAGCGGGTTTCATTGAAAATGGAT  |     |     |     |     |
| A/houbara/Dubai/AR438/2014          | CCGAACTC                                                     | CCAAAGGGAAGAGGCCTATTTGGTGCT | TATAGCGGGTTTCATTGAAAATGGAT  |     |     |     |     |
| A/Peregrine falcon/Dubai/AR439/2014 | CCGAACTC                                                     | CCAAAGGGAAGAGGCCTATTTGGTGCT | TATAGCGGGTTTCATTGAAAATGGAT  |     |     |     |     |
| A/duck/Germany/AR234/1/2016         | CCGAAATC                                                     | CCAAAAGGAAGAGGCCTGTTTGGTGCT | TATAGCAGGTTTCATTGAAAATGGAT  |     |     |     |     |
| A/nandu/Germany/AR142/2013          | CCGAAATC                                                     | CCAAAAGGAAGAGGCCTGTTTGGTGCT | TATAGCAGGTTTCATTGAAAATG---  |     |     |     |     |
| A/duck/Alberta/48/1976              | CCGAAATC                                                     | CCAAAGGGAAGAGGCCTTTTTGGTGCT | TATAGCGGGTTTCATTGAAAATGATT  |     |     |     |     |
| A/houbara/Dubai/AR433/2014          | CCGAACTC                                                     | CCAAAGGGAAGAGGCCTATTTGGTGCT | TATAGCGGGTTTCATTGAAAATGGAT  |     |     |     |     |
| A/houbara/Dubai/AR434/2014          | CCGAACTC                                                     | CCAAAGGGAAGAGGCCTATTTGGTGCT | TATAGCGGGTTTCATTGAAAATGGAT  |     |     |     |     |
| A/houbara/Dubai/AR435/2014          | CCGAACTC                                                     | CCAAAGGGAAGAGGCCTATTTGGTGCT | TATAGCGGGTTTCATTGAAAATGGAT  |     |     |     |     |
| A/houbara/Dubai/AR436/2014          | CCGAACTC                                                     | CCAAAGGGAAGAGGCCTATTTGGTGCT | TATAGCGGGTTTCATTGAAAATGGAT  |     |     |     |     |
| A/houbara/Dubai/AR437/2014          | CCGAACTC                                                     | CCAAAGGGAAGAGGCCTATTTGGTGCT | TATAGCGGGTTTCATTGAAAATGGAT  |     |     |     |     |
| A/mallard/Sko212-219K/2007          | CCGAACTC                                                     | CCAAAGGGAAGAGGCCTATTTGGTGCT | TATAGCGGGTTTCATKAAAA--GGAT  |     |     |     |     |
| A/mallard/NVP/41/2004               | CCGAAGTC                                                     | CCAAAGGGAAGAGGCCTATTTGGTGCT | TATAGCGGGTTTCAGTGAGGATGGAT  |     |     |     |     |
| A/mallard/Germany/R721/2006         | -CGAAATC                                                     | CCAAAGGGAAGAGGCCTATTTGGTGCT | TATAGCAGGTTTCATTGAAAATGGAT  |     |     |     |     |
|                                     | 121                                                          | 130                         | 140                         | 150 |     |     |     |
|                                     |                                                              |                             |                             |     |     |     |     |
| A/duck/Potsdam/13/1980              | GGGAAGGTCTGGTTGATGGATGGTAGGCTCA                              |                             |                             |     |     |     |     |
| A/swan/Potsdam/64/1981              | GGGAAGGTCTGGTTGATGGATGGTAGGCTCA                              |                             |                             |     |     |     |     |
| A/avian/R224/2010                   | GGAAGGTACT-GTTGAT-GATGGTAGGCTCA                              |                             |                             |     |     |     |     |
| A/commonpochard/Germany/R916/2006   | GGGAAGGTCTTATTGACGGGTGGTAGGCTCA                              |                             |                             |     |     |     |     |
| A/mallard/Alberta/8734/2007         | GGGATATACTAGTTGATGGATGGTAGGCTCA                              |                             |                             |     |     |     |     |
| A/chicken/Germany/AR909/2013        | GGGAAGGTCTGATTGACGGATGGTAGGCTTC                              |                             |                             |     |     |     |     |
| A/chicken/Germany/AR915/2015        | -----                                                        |                             |                             |     |     |     |     |
| A/chicken/Germany/AR925/2015        | GGGAAGGCCTGATTGACGGATGGTAGGCTTC                              |                             |                             |     |     |     |     |
| A/chicken/Germany/AR934/2015        | GGGAAGGCCTGATTGACGGATGGTAGGCTCA                              |                             |                             |     |     |     |     |
| A/chicken/Germany/AR942/2015        | -----TA                                                      |                             |                             |     |     |     |     |
| A/chicken/Germany/AR943/2015        | GGGAAGGCCTGATTGACGGATGGTAGGCTCA                              |                             |                             |     |     |     |     |
| A/chicken/Germany/AR944/2015        | GGGAAGGCCTGATTGACGGATGGTAGGCTCA                              |                             |                             |     |     |     |     |
| A/Mallard/Germany/R192/2009         | GGGAAGGTCTGATTGACGGGTGGTAGGCTCA                              |                             |                             |     |     |     |     |
| A/duck/Germany/R3129/2007           | GGGAAGGTCTGATTGACGGGTGGTAGGCTCA                              |                             |                             |     |     |     |     |
| A/Greylag goose/Germany/R752/2006   | GGGAAGGTCTGATTGACGGGTGGTAGGCTCA                              |                             |                             |     |     |     |     |
| A/mallard/Germany/R756/2006         | GGGAAGGTCTGATTGACGGGTGGTAGGCTCA                              |                             |                             |     |     |     |     |
| A/Teal/Föhr/Wv177/2005              | GGGAAGGTCTGATTGACGGGTGGTAGGCTCA                              |                             |                             |     |     |     |     |
| A/turkey/Germany/R655-5/2009        | GGGAGGGTCTGATTGATGGGTGGTAGGCTCA                              |                             |                             |     |     |     |     |
| A/francolin/Dubai/AR440/2014        | GGGAAGGTCTGATTGACGGGTGGTAGGCTCA                              |                             |                             |     |     |     |     |
| A/houbara/Dubai/AR438/2014          | GGGAAGGTCTGATTGACGGGTGGTAGGCTCA                              |                             |                             |     |     |     |     |
| A/Peregrine falcon/Dubai/AR439/2014 | GGGAAGGTCTGATTGACGGGTGGTAGGCTCA                              |                             |                             |     |     |     |     |
| A/duck/Germany/AR234/1/2016         | -----                                                        |                             |                             |     |     |     |     |
| A/nandu/Germany/AR142/2013          | -----                                                        |                             |                             |     |     |     |     |
| A/duck/Alberta/48/1976              | GGGGTTATCTGATTGACGGGTGGTAGGCTCA                              |                             |                             |     |     |     |     |
| A/houbara/Dubai/AR433/2014          | GGGAAGGTCTGATTGACGGGTGGTATGGCTT                              |                             |                             |     |     |     |     |
| A/houbara/Dubai/AR434/2014          | GGGAAGGTCTGATTGACGGGTGGTATGGCTT                              |                             |                             |     |     |     |     |
| A/houbara/Dubai/AR435/2014          | GGGAAGGTCTGATTGACGGGTGGTATGGCTT                              |                             |                             |     |     |     |     |
| A/houbara/Dubai/AR436/2014          | GGGAAGGTCTGATTGACGGGTGGTATGGCTT                              |                             |                             |     |     |     |     |
| A/houbara/Dubai/AR437/2014          | GGGAAGGTC-GATTGACGGGTGGTAGGCTCA                              |                             |                             |     |     |     |     |
| A/mallard/Sko212-219K/2007          | GGGAAGGTCTGATTGACGGGTGGTAGGCTCA                              |                             |                             |     |     |     |     |
| A/mallard/NVP/41/2004               | GGGAAGGTCTTATTGATGGTGGTAGGGCTCA                              |                             |                             |     |     |     |     |
| A/mallard/Germany/R721/2006         | GGAAGGCCCTCTTGACGGGTGGTAGGCTCA                               |                             |                             |     |     |     |     |
