# Supplementary material for: Real-time reverse transcription PCR-based sequencing-independent pathotyping of Eurasian avian influenza A viruses of subtype H7
Source: Springer Nature journal article supplement (doi:10.1186/s12985-017-0808-3), 2017-07-24
Supplement: MOESM2 [file 13324074]

1            10            20            30            40            50            60

|            |            |            |            |            |

A/chicken/Germany/"Taucha"/1979    AATGCCCCAGATATGTGAAACAAGAGAGCCTGCTACTGGCAACAGGGATGAAGAACGTTC

  A/Chicken/Germany/AR1385/2015    AATGTCCGAGATATGTTAAGCAGGAGAGTCTGATGCTAGCAACCGGAATGAAAAACGTTC

  A/chicken/Germany/AR1413/2015    TATGTCCGAGATATGTTAAGCAGGAGAGTCTGATGCTAGCAACCGGAATGAAAAACGTTC

A/chicken/Germany/AR1488/1/2015    TATGTCCGAGATATGTTAAGCAGGAGAGTCTGATGCTAGCAACCGGAATGAAAAACGTTC

A/environmen/Germany/AR1536/2015    TATGTCCGAGATATGTTAAGCAGGAGAGTCTGATGCTAGCAACCGGAATGAAAAACGTTC

A/environment/Germany/AR1537/2015    TATGTCCGAGATATGTTAAGCAGGAGAGTCTGATGCTAGCAACCGGAATGAAAAACGTTC

A/environment/Germany/AR1539/2015    TATGTCCGAGATATGTTAAGCAGGAGAGTCTGATGCTAGCAACCGGAATGAAAAACGTTC

A/environment/Germany/AR1540/2015    TATGTCCGAGATATGTTAAGCAGGAGAGTCTGATGCTAGCAACCGGAATGAAAAACGTTC

A/environment/Germany/AR1541/2015    TATGTCCGAGATATGTTAAGCAGGAGAGTCTGATGCTAGCAACCGGAATGAAAAACGTTC

A/environment/Germany/AR1546/2015    TATGTCCGAGATATGTTAAGCAGGAGAGTCTGATGCTAGCAACCGGAATGAAAAACGTTC

61            70            80            90            100            110            120

|            |            |            |            |            |

A/chicken/Germany/"Taucha"/1979    CTGAAATCCCAAAAAAGAAAAAGAAAAAGAGAGGCCTATTTGGTGCCATAGCGGGTTTTA

  A/Chicken/Germany/AR1385/2015    CTGAAATCCCA-----AAGAGAAAGAGAAGAGGCCTATTTGGTGCTATAGCGGGATTCA

  A/chicken/Germany/AR1413/2015    CTGAAATCCCA-----AAGAGAAAGAGAAGAGGCCTATTTGGTGCTATAGCGGGATTCA

A/chicken/Germany/AR1488/1/2015    CTGAAATCCCA-----AAGAGAAAGAGAAGAGGCCTATTTGGTGCTATAGCGGGATTCA

A/environmen/Germany/AR1536/2015    CTGAAATCCCA-----AAGAGAAAGAGAAGAGGCCTATTTGGTGCTATAGCGGGATTCA

A/environment/Germany/AR1537/2015    CTGAAATCCCA-----AAGAGAAAGAGAAGAGGCCTATTTGGTGCTATAGCGGGATTCA

A/environment/Germany/AR1539/2015    CTGAAATCCCA-----AAGAGAAAGAGAAGAGGCCTATTTGGTGCTATAGCGGGATTCA

A/environment/Germany/AR1540/2015    CTGAAATCCCA-----AAGAGAAAGAGAAGAGGCCTATTTGGTGCTATAGCGGGATTCA

A/environment/Germany/AR1541/2015    CTGAAATCCCA-----AAGAGAAAGAGAAGAGGCCTATTTGGTGCTATAGCGGGATTCA

A/environment/Germany/AR1546/2015    CTGAAATCCCA-----AAGAGAAAGAGAAGAGGCCTATTTGGTGCTATAGCGGGATTCA

121            130            140            150            160

|            |            |            |            |

A/chicken/Germany/"Taucha"/1979    TTGAAAATGGGTGGGAAGGTCTGATTGA-----

  A/Chicken/Germany/AR1385/2015    TTGAAAATGGATGGGAAGGCCTGATTGACGGATGGTATGGCTT

  A/chicken/Germany/AR1413/2015    TTGAAAATGGATGGGAAGGCCTGATTGACGGATGGTAGGCTCA

A/chicken/Germany/AR1488/1/2015    TTGAAAATGGATGGGAAGGCCTGATTGACGGATGGTAGGCTCA

A/environmen/Germany/AR1536/2015    TTGAAAATGGATGGGAAGGCCTGATTGACGGATGGTAGGCTCA

A/environment/Germany/AR1537/2015    TTGAAAATGGATGGGAAGGCCTGATTGACGGATGGTAGGCTCA

A/environment/Germany/AR1539/2015    TTGAAAATGGATGGGAAGGCCTGATTGACGGATGGTAGGCTCA

A/environment/Germany/AR1540/2015    TTGAAAATGGATGGGAAGGCCTGATTGACGGATGGTAGGCTCA

A/environment/Germany/AR1541/2015    TTGAAAATGGATGGGAAGGCCTGATTGACGGATGGTAGGCTCA

A/environment/Germany/AR1546/2015    TTGAAAATGGATGGGAAGGCCTGATTGACGGATGGTAGGCTCA

**HPAI H7**  
**Emsland probe**
